# Supplementary material
Source: publisher site journal article supplement (https://www.spandidos-publications.com/3453/downloadSupplementary)

Figure S1. H&E staining in the perihematoma following ICH. (A) H&E staining of the whole brain slice at 2 days post-ICH. Perihematoma at (C) x4, (D) x10, (E) x20 and (F) x40 magnification. (B) H&E staining of the whole brain slice at 7 days post-ICH. Black box indicates the hematoma. Perihematoma at (G) x4, (H) x10, (I) x20 and (J) x40 magnification. ICH, intracerebral hemorrhage; H&E, hematoxylin and eosin.

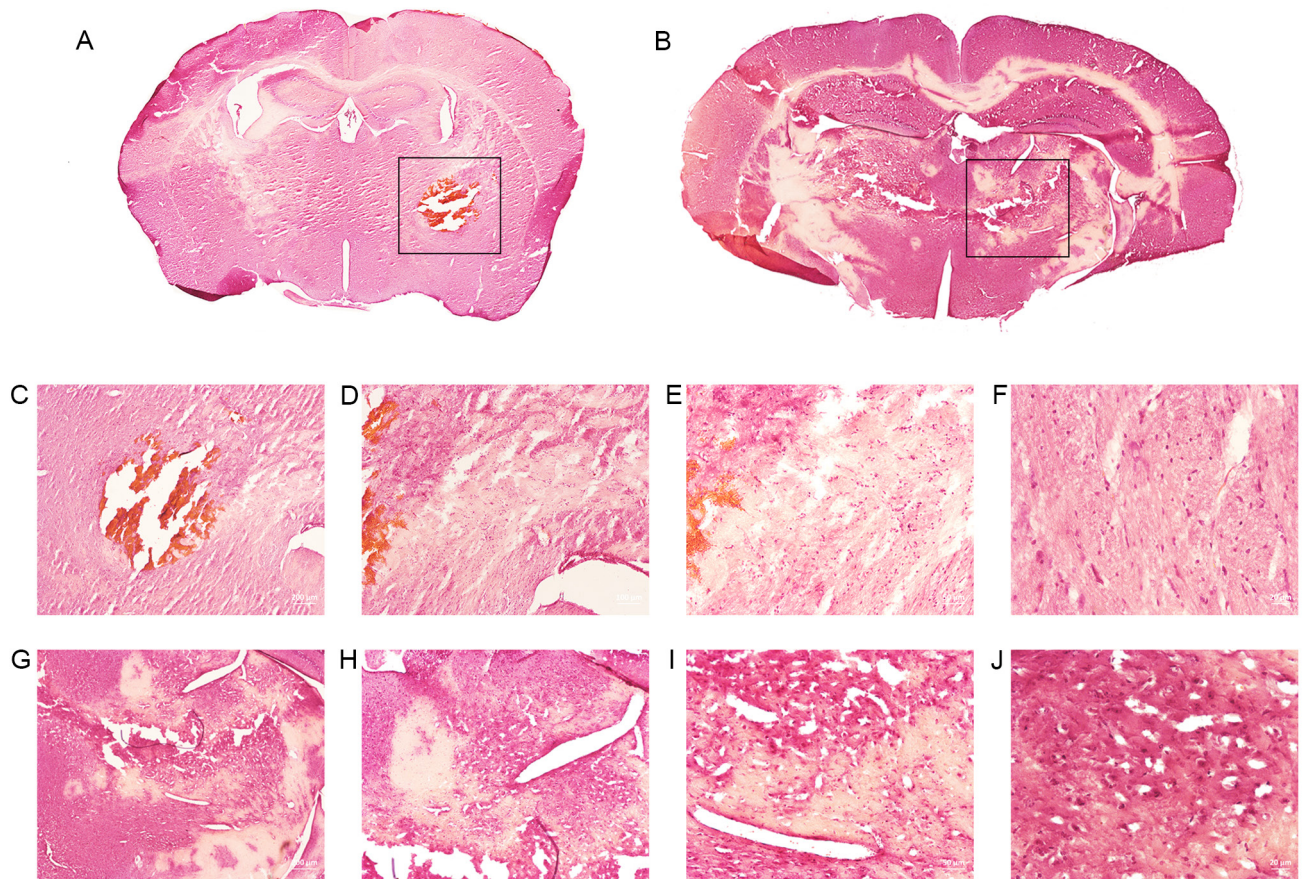

Supplement: Supplementary file 1 [file downloadSupplementary]
